# Supplementary material
Source: Springer Nature journal article supplement (https://www.springermedizin.de/resource/supplementary/12887_2011_591_MOESM4_ESM.pdf/9475848)
Supplement: MOESM4 [file 9475848]

Time to achieve a 5% increase in %CD4

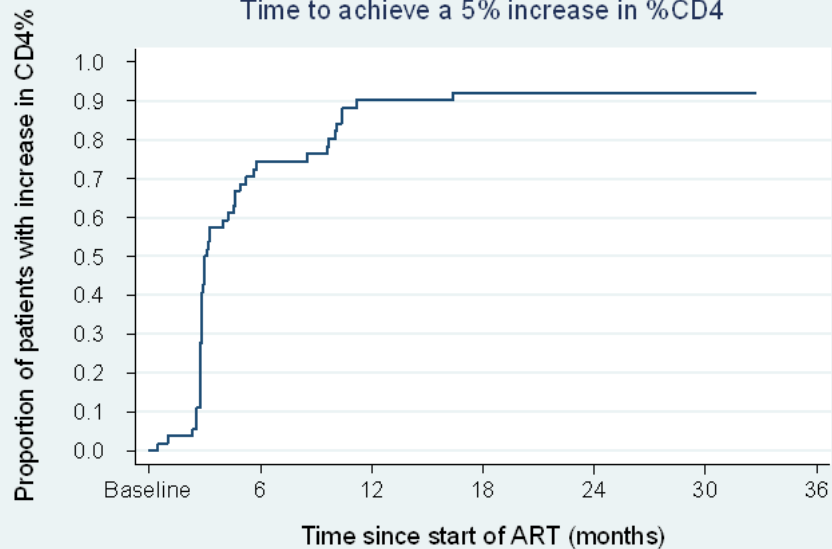

A

Time to achieve a 10% increase in %CD4

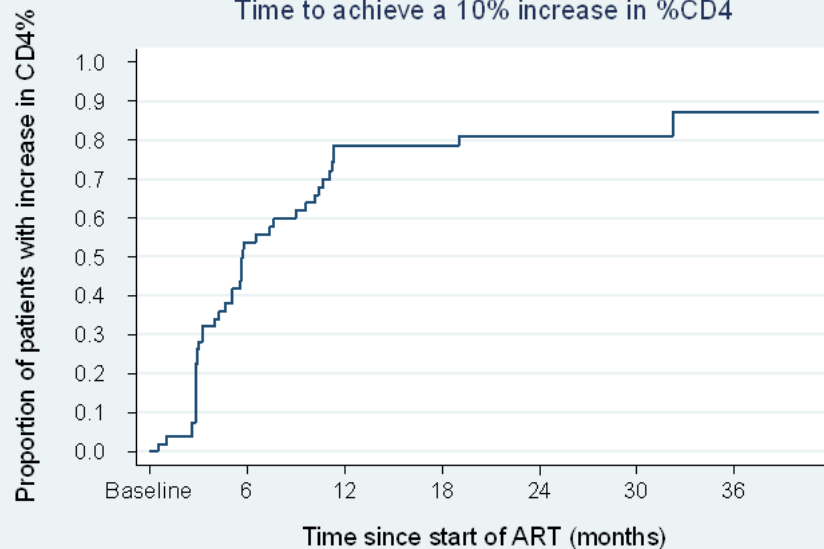

B

Time to achieve a 15% increase in %CD4

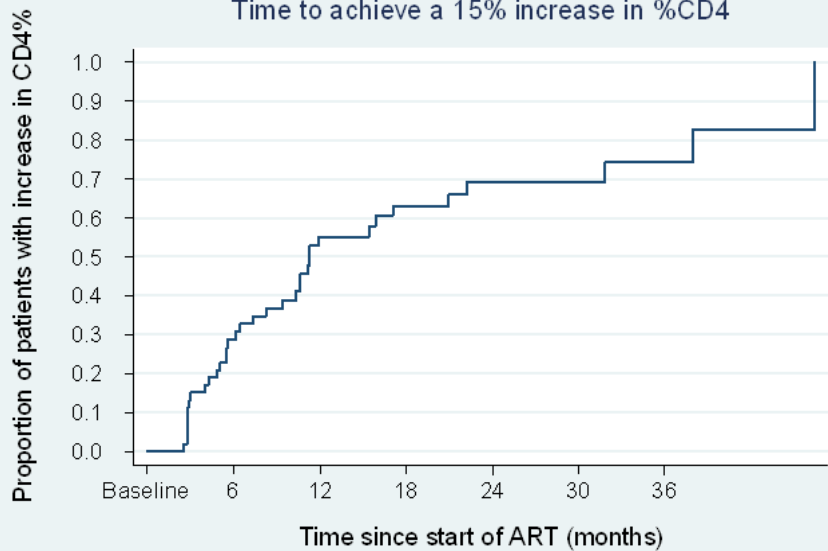

C
